# Supplementary material for: Identification of novel bile acids as biomarkers for the early diagnosis of Niemann‐Pick C disease
Source: PubMed Central journal article supplement — FEBS Lett. 2016 May 27;590(11):1651–62. doi: 10.1002/1873-3468.12196 (PMC5089630; doi:10.1002/1873-3468.12196), 2016-05-27
Supplement: FEB2-590-1651-s001.pdf [file FEB2-590-1651-s001.pdf]

## **Supplementary Materials:**

**Fig. S1.** Chromatographic separation between NPCBA2 and GCA (**A**) and between NPCBA1 and 3 $\beta$ -hydroxy,7 $\alpha$ -*N*-acetylglucosaminyl-5-cholenoic acid (**B**).

**Fig. S2.** Correlation between the concentrations of NPCBA2 in plasma and DBS.

**Fig. S3.** Matrix effect evaluated in plasma and urine.

**Table S1.** NPC1 genotypes of patients included in the study.

**Fig. S1.** Chromatographic separation between NPCBA2 and GCA (**A**) and between NPCBA1 and 3 $\beta$ -hydroxy,7 $\alpha$ -*N*-acetylglucosaminyl-5-cholenoic acid (**B**).

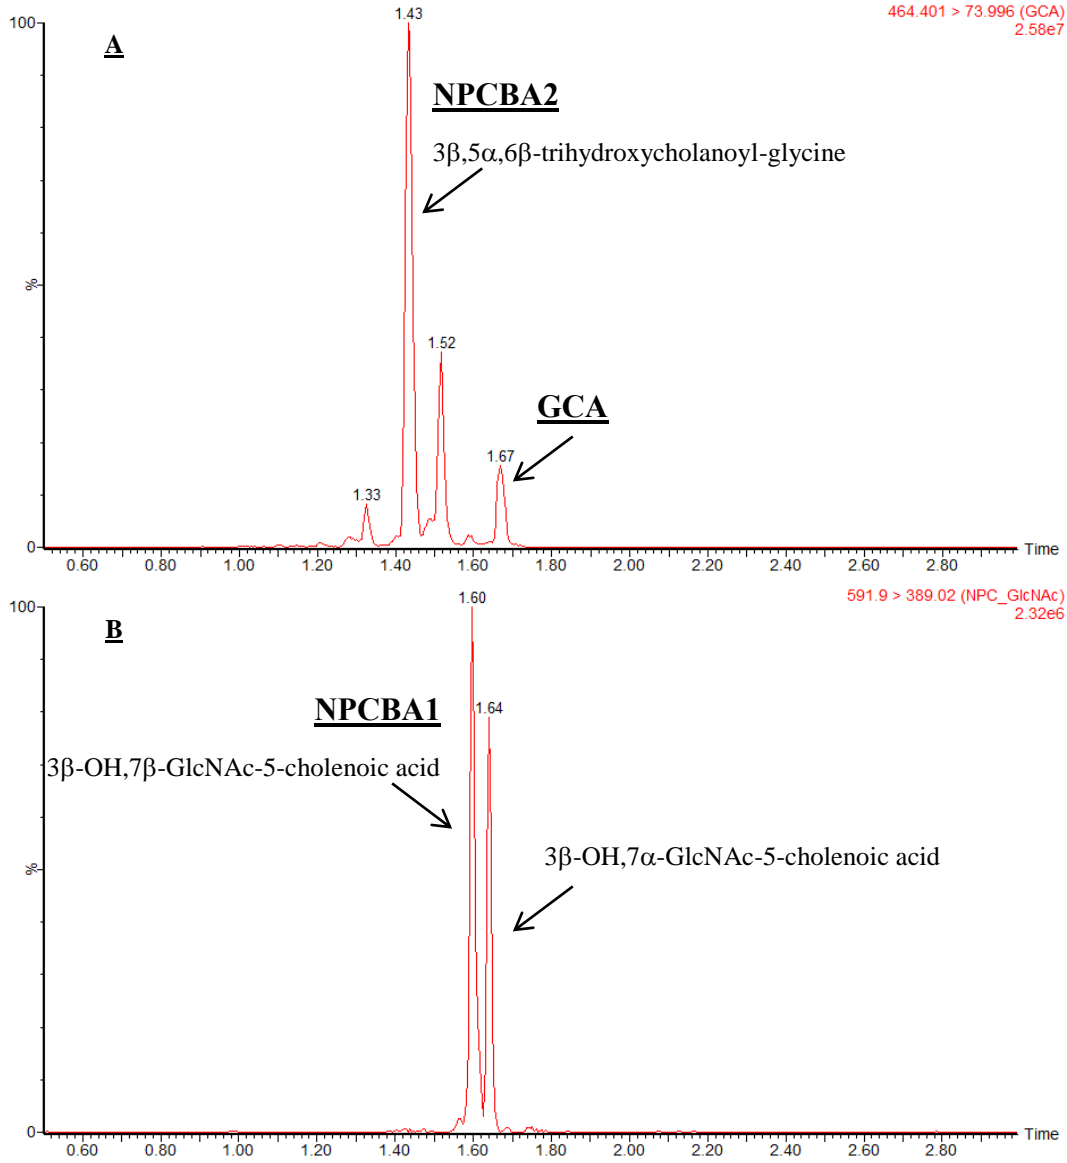

(**A**) An example of chromatographic separation between NPCBA2 and glycocholic acid (GCA) in a urine sample from a positive NPC patient. SRM transition [464.4>74 m/z]. (**B**) Example of chromatographic separation between NPCBA1 (3 $\beta$ -hydroxy,7 $\beta$ -*N*-acetylglucosaminyl-5-

cholenoic acid) and 3 $\beta$ -hydroxy,7 $\alpha$ -*N*-acetylglucosaminyl-5-cholenoic acid in a urine sample from a patient with 3 $\beta$ -HSDH deficiency. SRM transition [591.9>389.0 m/z].

**Fig. S2.** Correlation between the concentrations of NPCBA2 in plasma and DBS.

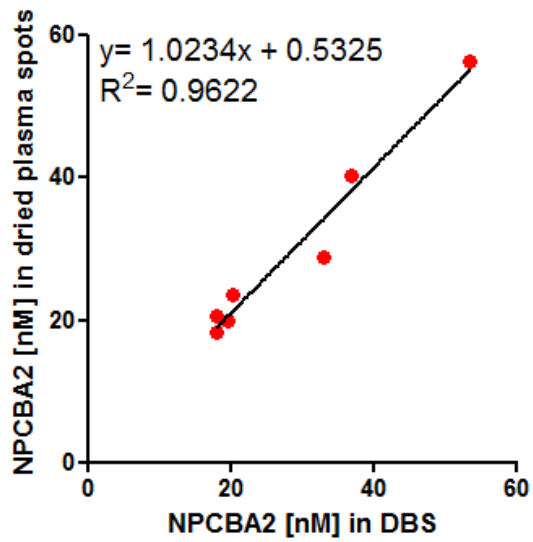

Correlation between the amount of NPCBA2 extracted from 10  $\mu\text{L}$  plasma spot and 6 mm dried blood spot, estimated to contain 12.4  $\mu\text{L}$  of blood (32).

**Fig. S3.** Matrix effect evaluated in plasma and urine.

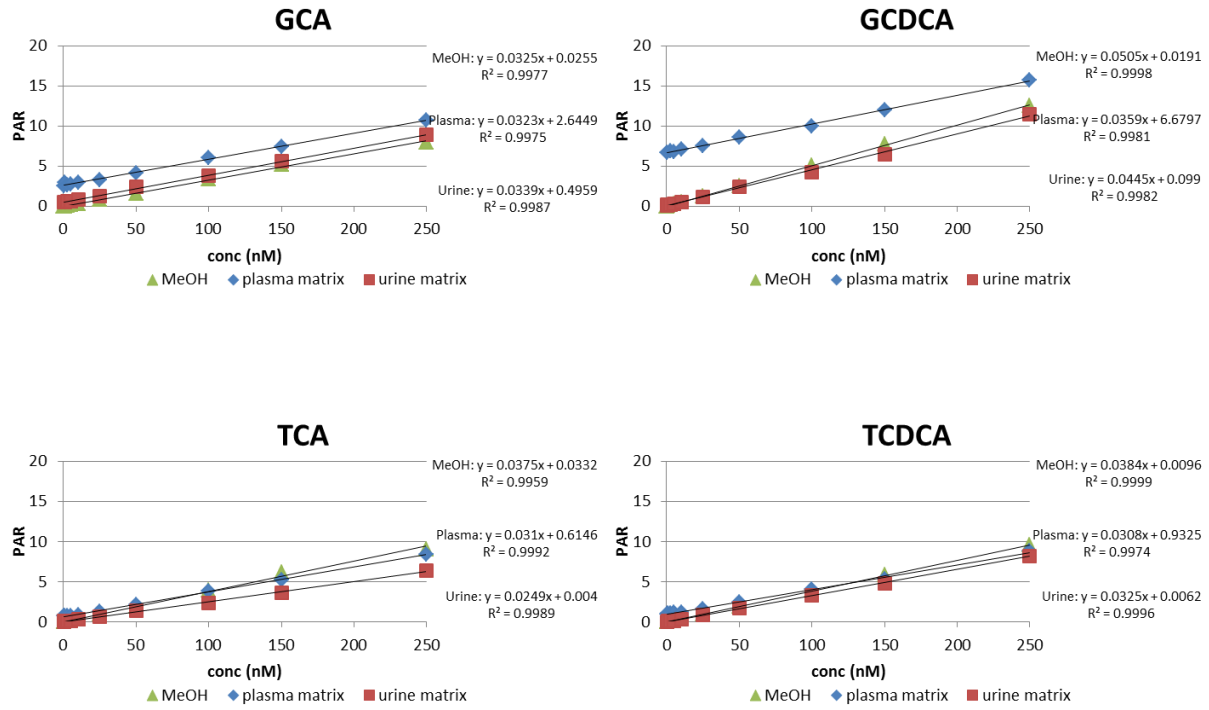

Matrix effect, calculated for the main bile acids (glycocholic acid, glycochenodeoxy cholic acid, taurocholic acid and taurochenodeoxycholic acid) in plasma, urine and methanol.

**Table S1.** *NPC1* genotypes of patients included in the study.

| Protein amino acid change                                 | DNA nucleotide change            |
|-----------------------------------------------------------|----------------------------------|
| I1061T, F1167C                                            | 3182T>C, 3499T>G                 |
| Y825C, A105T                                              | 2474A>G, 315G>A                  |
| fs(exon12), IVS9                                          | 1920delG, 1554-1009G>A           |
| hom. A470P and I837V                                      | 3 and 4 possible changes         |
| hom. Q116Qfs                                              | hom. 350delAG                    |
| F842L, F1221SfsX20                                        | 6 possible changes, 3662delT     |
| P237S, V371X                                              | 709C>T, 11112delT                |
| R404Q, S954L, T375A (variant)                             | 1211G>A, 2861C>T, 1123A>G        |
| R404Q, P1007A                                             | 1211G>A, 3019C>G                 |
| G46V, P691L                                               | 137G>T, 2072C>T                  |
| P691S, F760Sfs                                            | 2071C>T, 2279-2281TCTdel         |
| A732Vfs, Y825C                                            | 2195insT, 2474A>G                |
| S734I, S954L                                              | 2201G>T, 2861C>T                 |
| D771Vfs , G992R                                           | 2312_2315delACTT, 2974 G>C       |
| Y825C, 97dupC or 97insC                                   | 2474A>G, 289_291dupTGT           |
| F842L, T933I (also NPC2 mutation)                         | 2524T>C, 2798C>T, 442-4A>C(NPC2) |
| P887L, L1247fs(exon24)                                    | 2660C>T, 3741-3744delIACCTC      |
| A926V, P1007A                                             | 2777C>T, 3019C>G                 |
| S954F, P1007A                                             | 2819C>T, 3019C>G                 |
| S954L                                                     | 2861C>T, IVS23+1G>A              |
| S954L, I1061T                                             | 2861C>T, 3182T>C                 |
| R978C, IVS21-2A>G                                         | 2932C>T, 3246-2A>G               |
| I1061T, H1016R                                            | 3047A>T, 3182T>C                 |
| A1023Sfs*15, G992R                                        | 3066_3073delinsT, 2974G>C        |
| T1036M, F1207S                                            | 3107C>T, 3620T>C                 |
| I1061T, R1186G                                            | 3182T>C, 3556C>G                 |
| I1061T, R404Q                                             | 3182T>C, 1211G>A                 |
| I1061T, S954L                                             | 3182T>C, 1628C>T                 |
| I1061T, P691Q                                             | 3182T>C, 2072C>A                 |
| I1061T, D948N                                             | 3182T>C, 2842G>A                 |
| I1061T, 10 bp deletion in exon 19 at codon 962=fs(exon19) | 3182T>C, 2884-93delinsATCACTGACC |
| I1061T, P1007A                                            | 3182T>C, 3019C>G                 |
| I1061T, T1036M                                            | 3182T>C, 3107C>T                 |
| I1061T, I1094T                                            | 3182T>C, 3281T>C                 |
| I1061T, E1188*                                            | 3182T>C, 3562G>T                 |
| I1061T, fs(exon24)                                        | 3182T>C, 3742_3745delCTCA        |
| I1061T, K142Rfs                                           | 3182T>C, 423_424dupGA            |
| I1061T, P237S, IVS12+5 G>C                                | 3182T>C, 709C>T, 1947+5G>C       |

|                         |                            |
|-------------------------|----------------------------|
| G1146V                  | 3439G>T, 3742_3745delCTCA  |
| hom. G1162A             | hom. 3485G>C               |
| V1165M, L1247fs(exon24) | 3493G>A, 3741-44delACTC    |
| T137M, S667L            | 410C>T, 20000C>T           |
| T137M, I1061T           | 410C>T, 3182T>C            |
| N222S, C468G            | 665A>G, 4 possible changes |
| N222S, I1061T           | 665A>G, 3182T>C            |
| C247Y, P401T            | 740G>A, 1201C>A            |
| G248V, fs (exon 22)     | 743G>T, 3410_3411 insA     |
| hom I1061T              | hom 3182T>C                |
| hom. S734I              | hom. 2201G>T               |
| I1061T, V1141G          | 3182T>C, 3422T>G           |
| I1061T                  | 3182T>C, C3591+4del        |
| I1061T, E1189G          | 3182T>C, 1189A>G           |
| I1061T, R1059Q          | 3182T>C, 3176G>A           |
| I1061T, R934Q           | 3182T>C, 2801G>A           |
| hom. R518W              | hom. 1553G>A               |
| R518W, S95F             | 1553G>A, 284C>T            |
